# Supplementary material for: Role of clinical, functional and social factors in the association between multimorbidity and quality of life: Findings from the Survey of Health, Ageing and Retirement in Europe (SHARE)
Source: PLoS One. 2020 Oct 20;15(10):e0240024. doi: 10.1371/journal.pone.0240024 (PMC7575102; doi:10.1371/journal.pone.0240024)
Supplement: S3 Table — (XLSX) [file pone.0240024.s003.xlsx]

## Sheet: coefficient estimate change
			Coefficient of the number of conditions	[95% Conf. Interval]			(15% and over = significant)	non-significance range
BM	chronic_no_other_diseases		-2.38921	-2.66379	-2.11463		0.358381	-2.74759	-2.03083
BM+symptoms	chronic_no_other_diseases		-1.27232	-1.53311	-1.01152		0.467473	-1.11689	-2.38921
BM+polypharmacy	chronic_no_other_diseases		-1.91133	-2.19672	-1.62593		0.200017	-0.477883	-2.38921
BM+unmet needs_cost	chronic_no_other_diseases		-2.29874	-2.55126	-2.04622		0.0378665	-0.090471	-2.38921
BM+unmet needs_wait	chronic_no_other_diseases		-2.2945	-2.55454	-2.03446		0.0396407	-0.09471	-2.38921
BM+unmet needs_dentist	chronic_no_other_diseases		-2.31149	-2.57828	-2.0447		0.0325304	-0.077722	-2.38921
BM+number of times talked to dr/nurse	chronic_no_other_diseases		-2.00936	-2.279	-1.73973		0.158984	-0.379845	-2.38921
BM+hospital overnight stay	chronic_no_other_diseases		-2.28019	-2.56023	-2.00015		0.0456306	-0.109021	-2.38921
BM+sn size	chronic_no_other_diseases		-2.44147	-2.71446	-2.16848		-0.0218738	0.052261	-2.38921
BM+loneliness	chronic_no_other_diseases		-1.87091	-2.07292	-1.6689		0.216934	-0.5183	-2.38921
BM+received care from outside	chronic_no_other_diseases		-2.3022	-2.57723	-2.02717		0.0364179	-0.08701	-2.38921
BM+given care to someone outside household	chronic_no_other_diseases		-2.38296	-2.65771	-2.10821		0.00261593	-0.00625	-2.38921
BM+given care to someone inside household	chronic_no_other_diseases		-2.38807	-2.66261	-2.11352		0.000479238	-0.001145	-2.38921
BM+financial interaction	chronic_no_other_diseases		-2.39049	-2.666	-2.11498		-0.000534905	0.001278	-2.38921
BM+social activities	chronic_no_other_diseases		-2.34625	-2.62639	-2.06611		0.0179825	-0.042964	-2.38921
BM+ADL/IADL	chronic_no_other_diseases		-1.83998	-2.11044	-1.56951		0.229881	-0.549234	-2.38921
BM - basic model adjusted for socio-economic factors only
sn size - social network size
ADL/IADL activities of daily living/instrumental activities of daily living
in yellow = ≥15% coefficient estimate change
